# Supplementary material for: Whole exome sequencing in Alopecia Areata identifies rare variants in KRT82
Source: PubMed Central journal article supplement (PMC8831607; doi:10.1038/s41467-022-28343-3), 2022-02-10
Supplement: 41467_2022_28343_MOESM1_ESM.pdf [file 41467_2022_28343_MOESM1_ESM.pdf]

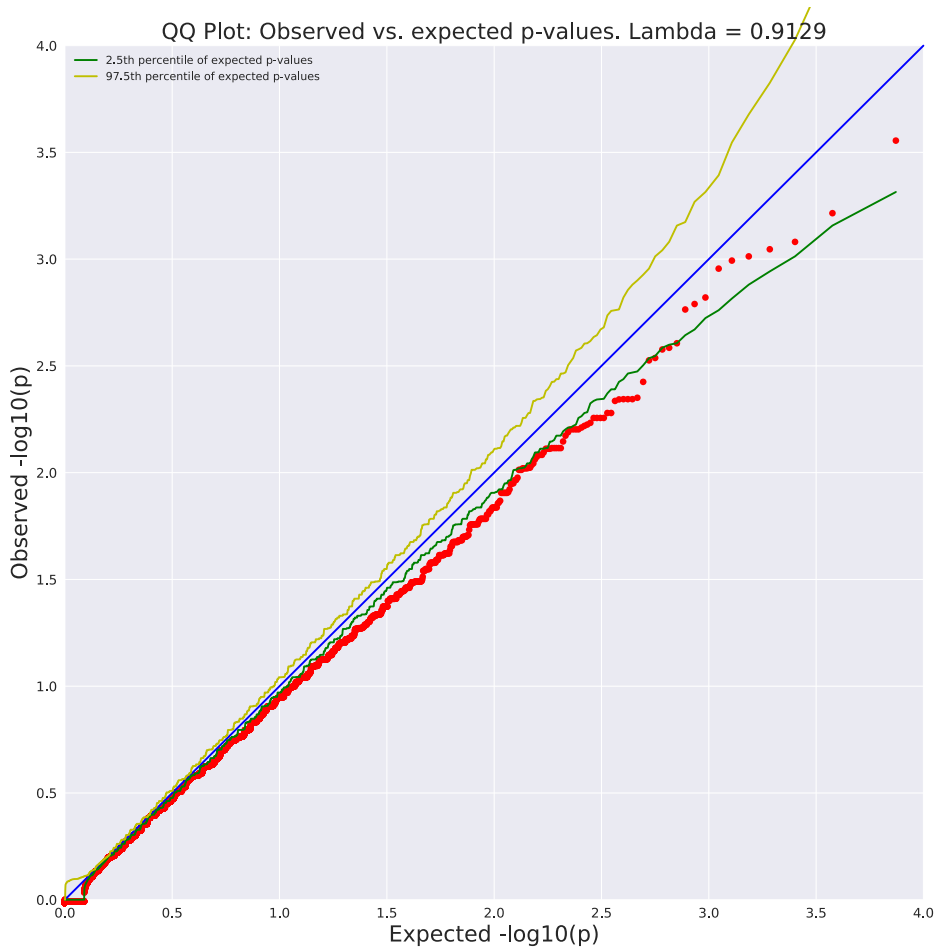

**Supplementary Fig. 1 Rare Synonymous Variant-Gene Collapsing Model.** Qualifying variants in this model included any rare (MAF  $\leq$  0.01%) and synonymous variants, that are predicted to have no pathogenic role. Low inflation (lambda ( $\lambda$ ) = 0.91) of representative Q-Q plot. No genes reached genome-wide significance in the rare synonymous variant model, serving as a negative control. Synonymous variants do not affect the protein product, and therefore should not have a pathogenic effect or be associated with disease. Under this rationale, distribution of p-values should follow the null distribution without any significant associations, as seen here.

| Model      | Gene   | Cases | Controls | Case Frequency | Control Frequency | P-value  |
|------------|--------|-------|----------|----------------|-------------------|----------|
| Synonymous | AQP2   | 6     | 13       | 7.1%           | 0.1%              | 2.79E-04 |
|            | OTOF   | 0     | 151      | 0%             | 1.0%              | 6.09E-04 |
|            | HS1BP3 | 7     | 24       | 0.8%           | 0.2%              | 8.30E-04 |

**Supplementary Table 1** No genes in the rare synonymous variant model (negative control model) reach genome-wide significance p-value was determined by two-tailed Fisher's exact test (FET).

| Haplotype ID | 12-5278828-6-A | 12-5278944-1-T-C | 12-5278944-1-T-C | 12-5278950-T-C | 12-5278957-A-G | 12-5278965-T-A | 12-5278965-T-A | 12-5278969-A-C | 12-5278983-G-T-G | 12-5278984-C-A | 12-5278985-T-C | 12-5278986-C-T | 12-5278989-T-C | 12-5278994-C-T | 12-5278994-T-G | 12-5279355-C-A | 12-5279376-T-C-A | 12-5279782-T-C | 12-5279844-C-T | 12-5279849-T-C | 12-5279882-G-A |   |
|--------------|----------------|------------------|------------------|----------------|----------------|----------------|----------------|----------------|------------------|----------------|----------------|----------------|----------------|----------------|----------------|----------------|------------------|----------------|----------------|----------------|----------------|---|
| Hap01        | A              | C                | C                | C              | G              | A              | A              | C              | G                | A              | C              | T              | C              | T              | G              | A              | A                | C              | T              | C              | C              | G |
| Hap02        | A              | C                | C                | C              | G              | A              | A              | C              | G                | A              | C              | T              | C              | T              | G              | A              | A                | C              | C              | C              | C              | G |
| Hap03        | G              | T                | T                | T              | A              | A              | A              | A              | GT               | A              | T              | T              | T              | C              | A              | A              | A                | C              | C              | T              | C              | G |
| Hap04        | A              | C                | C                | C              | G              | A              | A              | C              | G                | C              | C              | T              | C              | T              | G              | A              | A                | C              | T              | C              | C              | G |
| Hap05        | A              | C                | T                | C              | G              | A              | A              | C              | G                | C              | C              | T              | C              | T              | G              | A              | A                | T              | T              | T              | T              | G |
| Hap06        | A              | C                | C                | C              | G              | A              | A              | C              | G                | A              | T              | T              | T              | T              | A              | C              | A                | C              | T              | C              | C              | G |
| Hap07        | A              | C                | C                | C              | G              | A              | A              | C              | G                | A              | C              | C              | C              | T              | G              | A              | A                | C              | T              | C              | C              | G |
| Hap08        | A              | C                | C                | C              | G              | A              | A              | C              | G                | A              | C              | T              | C              | T              | G              | A              | A                | C              | T              | C              | C              | A |
| Hap09        | G              | T                | C                | T              | G              | A              | A              | A              | GT               | A              | C              | T              | C              | C              | G              | A              | <b>G</b>         | C              | C              | T              | C              | A |
| Hap10        | A              | C                | C                | C              | G              | T              | T              | C              | G                | A              | C              | T              | C              | T              | G              | A              | A                | C              | T              | C              | C              | A |
| Hap11        | G              | T                | C                | T              | G              | A              | A              | <b>C</b>       | <b>G</b>         | A              | C              | T              | C              | C              | A              | A              | A                | C              | C              | T              | C              | A |
| Hap12        | G              | T                | C                | T              | A              | T              | A              | A              | GT               | A              | C              | T              | C              | C              | G              | A              | A                | C              | C              | T              | C              | A |
| Hap13        | G              | T                | C                | T              | G              | A              | A              | A              | GT               | A              | C              | T              | C              | C              | G              | A              | A                | C              | C              | T              | C              | A |

**Supplementary Table 2 Arg47X alternate allele (A) resides on at least 6 distinct haplotypes.** Each column represents a variant, and each row represents a haplotype. Arg47X alternate allele (A) that results in a premature stop codon is highlighted in red in the last column. After phasing, we report that the A allele resides on at least six distinct haplotypes. In this region, thirteen total haplotypes are observed. Black bolded boxes denote where the haplotypes differ..
